# Supplementary material for: SARS-CoV-2 Distribution in Residential Housing Suggests Contact Deposition and Correlates with Rothia sp
Source: PubMed Central journal article supplement — medRxiv. 2021 Dec 7:2021.12.06.21267101. Preprint. [Version 1] doi: 10.1101/2021.12.06.21267101 (PMC8669860; doi:10.1101/2021.12.06.21267101), 2021-12-07

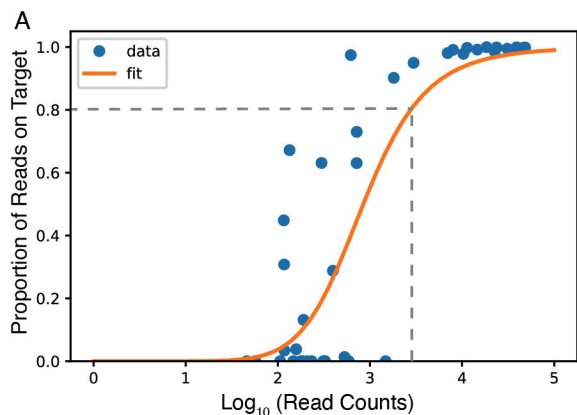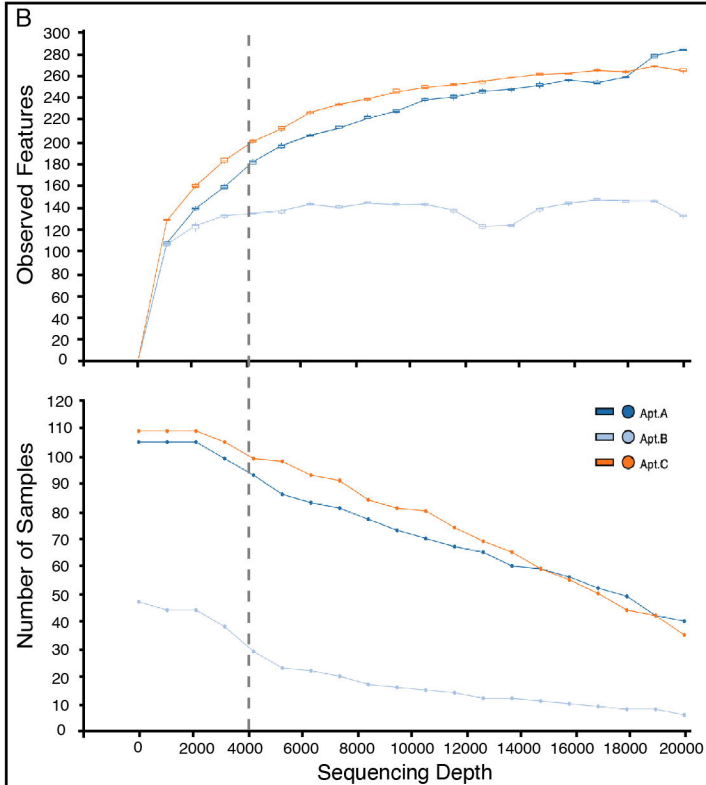

**C**

| Apartment               | Apt A |    | Apt B |    | Apt C |    | Total |     |
|-------------------------|-------|----|-------|----|-------|----|-------|-----|
|                         | +     | -  | +     | -  | +     | -  | +     | -   |
| Total Samples Sequenced | 74    | 66 | 28    | 88 | 76    | 49 | 178   | 203 |
| <KatharoSeq Threshold   | 6     | 30 | 14    | 55 | 2     | 14 | 22    | 99  |
| <Rarefaction Threshold  | 5     | 5  | 6     | 11 | 2     | 7  | 13    | 23  |
| Samples Removed         | 11    | 35 | 20    | 66 | 4     | 21 | 35    | 122 |
| Samples Included        | 63    | 31 | 8     | 22 | 72    | 28 | 143   | 81  |

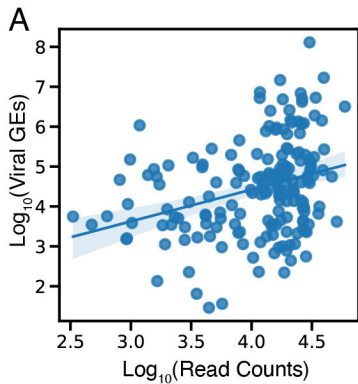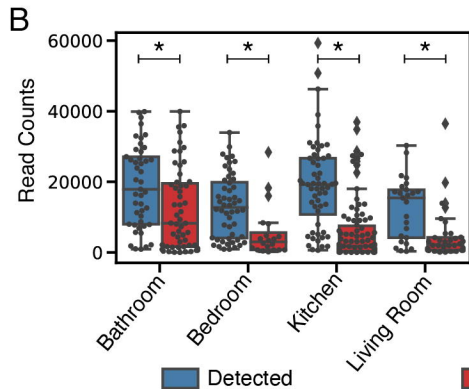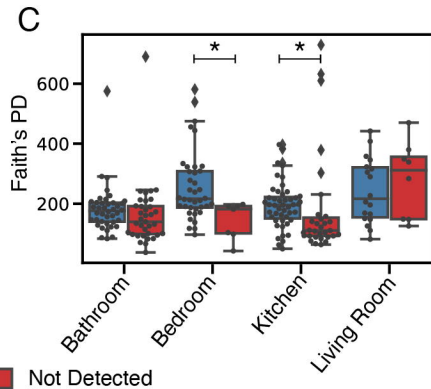

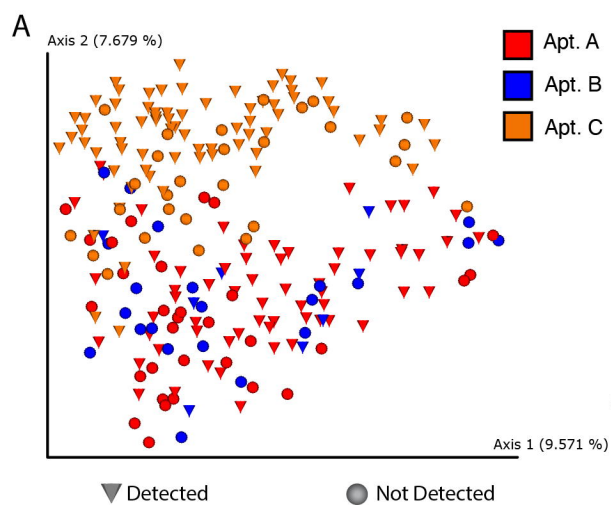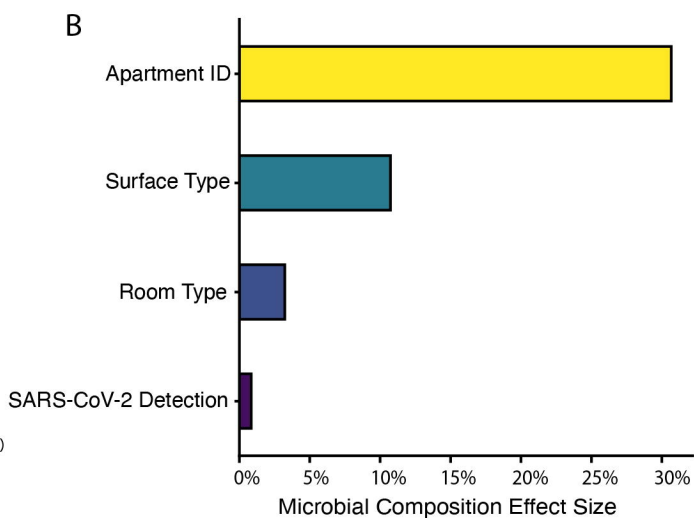

Supplement: NIHPP2021.12.06.21267101v1-supplement-1.pdf [file NIHPP2021.12.06.21267101v1-supplement-1.pdf]
